# Supplementary material
Source: Springer Nature journal article supplement (https://www.springermedizin.de/resource/supplementary/13063_2014_2329_MOESM1_ESM.pdf/9621930)

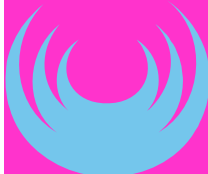

**FEMME** - A randomised trial of treating **F**ibroids with **E**mbolisation or **M**ymectomy to **M**easure the **E**ffect on quality of life among women wishing to avoid hysterectomy

# Is my patient suitable for FEMME?

The flowchart below will quickly let you know if your patient is eligible for the FEMME trial.

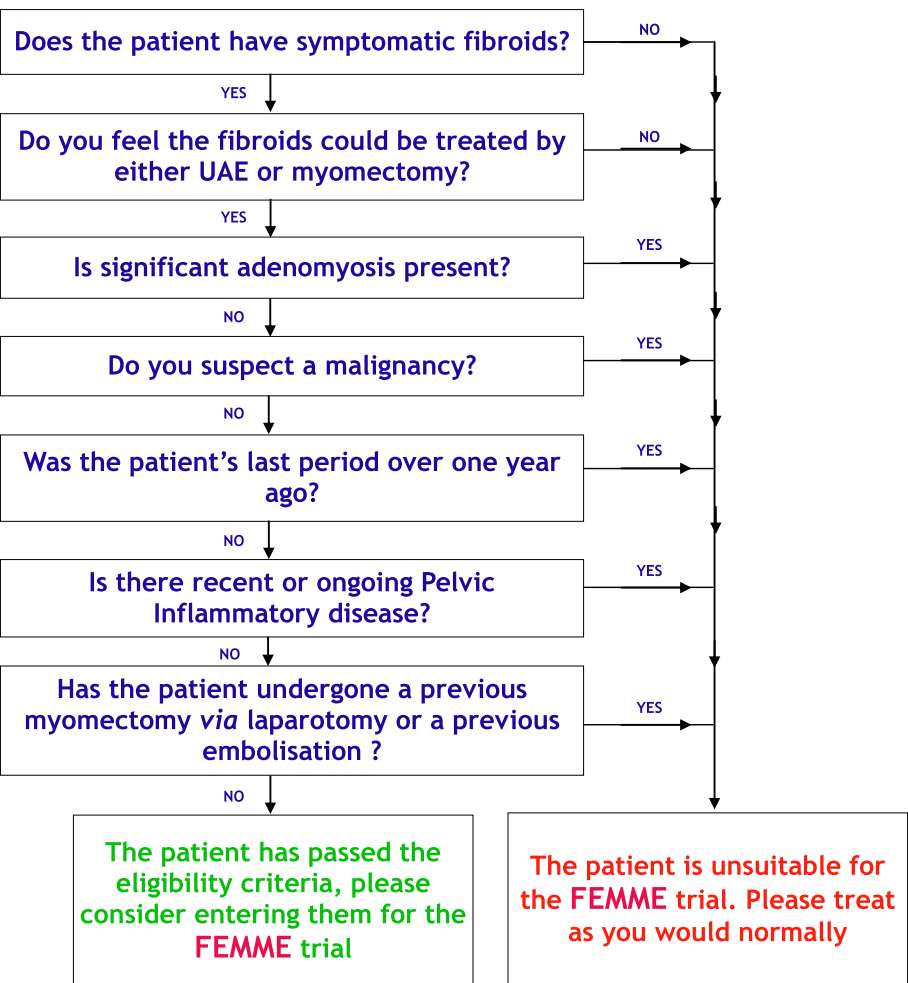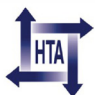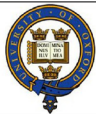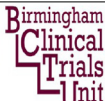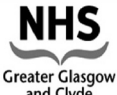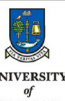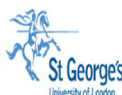

Supplement: MOESM1 [file 9621930]
